# Supplementary material for: A polygenic basis for four classical Fredrickson hyperlipoproteinemia phenotypes that are characterized by hypertriglyceridemia
Source: PubMed Central journal article supplement — Hum Mol Genet. 2009 Aug 5;18(21):4189–94. doi: 10.1093/hmg/ddp361 (PMC2758142; doi:10.1093/hmg/ddp361), 2009-08-05
Supplement: ddp361_1.pdf [file ddp361_1.pdf]

## SUPPLEMENTARY MATERIAL

**Table S1. Features of classical hyperlipoproteinemia (HLP) phenotypes**

| WHO ICD number | Frederickson HLP phenotype                                 | MIM number           | Lipids   | Lipoproteins   | Genetics                                                                                                                                                                                                                   |
|----------------|------------------------------------------------------------|----------------------|----------|----------------|----------------------------------------------------------------------------------------------------------------------------------------------------------------------------------------------------------------------------|
| E78.3          | HLP type 1<br>Familial chylomicronemia (LPL deficiency)    | 238600               | ↑TG      | ↑CM            | Primarily pediatric and young adults;<br>Monogenic;<br>AR due to mutant <i>LPL</i> or <i>APOC2</i>                                                                                                                         |
| E78.0          | HLP type 2A<br>Familial hypercholesterolemia (FH)          | 143890               | ↑TC      | ↑LDL           | Monogenic;<br>Heterozygous form due to mutant <i>LDLR</i> ,<br><i>APOB</i> or <i>PCSK9</i> ; Homozygous form due<br>to mutant <i>LDLR</i> or <i>ARH</i>                                                                    |
| E78.4          | HLP type 2B (HLP2B)<br>Combined hyperlipoproteinemia (CHL) | 144250               | ↑TC, ↑TG | ↑VLDL,<br>↑LDL | Polygenic, multiple etiologies, some<br>cases due to <i>USF1</i> , <i>APOB</i> or <i>LPL</i> ;<br>Common <i>APOA5</i> SNPs associated (ref.<br>22)                                                                         |
| E78.2          | HLP type 3<br>Dysbetalipoproteinemia (DBL)                 | 107741               | ↑TC, ↑TG | ↑IDL           | Polygenic; <i>APOE</i> E2/E2 homozygosity<br>or mutant <i>APOE</i> necessary but not<br>sufficient; Common <i>APOA5</i> SNPs<br>associated (ref. 22)                                                                       |
| E78.1          | HLP type 4<br>Primary hypertriglyceridemia (HTG)           | 144600<br>and 145750 | ↑TG      | ↑VLDL          | Polygenic; Common <i>APOA5</i> SNPs<br>associated (ref. 22)                                                                                                                                                                |
| E78.3          | HLP type 5<br>Mixed hyperlipidemia (MHL)                   | 144650               | ↑TC, ↑TG | ↑VLDL,<br>↑CM  | Polygenic; rare mutations in <i>LPL</i> ,<br><i>APOC2</i> and <i>APOA5</i> in ~10% of cases<br>(ref. 20); Common <i>APOA5</i> , <i>TRIB1</i> ,<br><i>TBL2</i> , <i>GCKR</i> and <i>GALNT2</i> SNPs<br>associated (ref. 21) |

abbreviations: WHO, World Health Organization; ICD, International Classification of Diseases; HLP, hyperlipoproteinemia; MIM, Mendelian Inheritance in Man; LPL, lipoprotein lipase; TG, triglyceride; TC, total cholesterol; CM, chylomicrons; VLDL, very-low density lipoprotein; LDL, low-density lipoprotein; IDL, intermediate-density lipoprotein; AR, autosomal recessive; *LPL*, gene encoding LPL; *APOC2*, gene encoding apolipoprotein (apo) C-II; *APOB*, gene encoding apo B; *PCSK9*, gene encoding proprotein convertase subtilisin/kexin type 9; *ARH*, gene encoding autosomal recessive hypercholesterolemia protein; *USF1*, gene encoding upstream stimulatory factor 1; *APOE*, gene encoding apo E; *APOA5*, gene encoding apo A-V; *TRIB1*, gene encoding homologue of *Drosophila Tribbles 1*; *TBL2* locus containing genes encoding transducin-beta-like-2 and MLX interacting protein-like (also called carbohydrate response element binding protein [ChREBP]); *GCKR*, gene encoding glucokinase receptor; *ANGPTL3*, gene encoding angiopoietin-like 3; *GALNT2*, gene encoding UDP-N-acetyl-alpha-D-galactosamine:polypeptide N-acetylgalactosaminyltransferase

**Table S2. Genotype counts and frequencies of candidate genes in HLP types**

|                            |    | Type 2A    | Type 2B    | Type 3      | Type 4     | Type 5      | Controls    |
|----------------------------|----|------------|------------|-------------|------------|-------------|-------------|
| <i>APOA5</i> p.S19W        | SS | 72 (87.8%) | 53 (77.9%) | 29 (69.1%)  | 41 (85.4%) | 98 (67.1%)  | 221 (91.3%) |
|                            | SW | 9 (11.0%)  | 14 (20.6%) | 12 (28.6%)  | 6 (12.5%)  | 41 (28.1%)  | 17 (7.0%)   |
|                            | WW | 1 (1.2%)   | 1 (1.5%)   | 1 (2.4%)    | 1 (2.1%)   | 7 (4.79%)   | 4 (1.7%)    |
| <i>APOA5</i><br>-1131T>C   | TT | 70 (85.4%) | 57 (83.8%) | 30 (71.4%)  | 31 (64.6%) | 99 (67.8%)  | 219 (90.5%) |
|                            | TC | 11 (13.4%) | 11 (16.2%) | 11 (26.2%)  | 17 (35.4%) | 38 (26.0%)  | 23 (9.5%)   |
|                            | CC | 1 (1.2%)   | 0          | 1 (2.4%)    | 0          | 9 (6.2%)    | 0           |
| <i>APOA5</i><br>rs6589566  | AA | 70 (85.4%) | 55 (80.9%) | 30 (71.4%)  | 32 (66.7%) | 96 (65.8%)  | 212 (88.0%) |
|                            | AG | 11 (13.4%) | 13 (19.1%) | 11 (26.2%)  | 16 (33.3%) | 41 (28.1%)  | 29 (12.0%)  |
|                            | GG | 1 (1.2%)   | 0          | 1 (2.4%)    | 0          | 9 (6.2%)    | 0           |
| <i>APOA5</i><br>rs12286037 | CC | 72 (87.8%) | 52 (76.5%) | 29 (69.05%) | 41 (85.4%) | 97 (66.4%)  | 221 (91.7%) |
|                            | CT | 9 (11.0%)  | 15 (22.1%) | 12 (28.6%)  | 6 (12.5%)  | 43 (29.5%)  | 16 (6.7%)   |
|                            | TT | 1 (1.22%)  | 1 (1.5%)   | 1 (2.4%)    | 1 (2.1%)   | 6 (4.1%)    | 4 (1.7%)    |
| <i>BUD13</i><br>rs964184   | CC | 61 (74.4%) | 41 (60.3%) | 22 (53.7%)  | 28 (58.3%) | 58 (40.0%)  | 193 (79.8%) |
|                            | CG | 18 (22.0%) | 24 (35.3%) | 12 (29.3%)  | 16 (33.3%) | 62 (42.8%)  | 45 (18.6%)  |
|                            | GG | 3 (3.7%)   | 3 (4.4%)   | 7 (17.1%)   | 4 (8.3%)   | 25 (17.2%)  | 4 (1.7%)    |
| <i>BUD13</i><br>rs28927680 | CC | 70 (87.5%) | 52 (76.5%) | 31 (73.8%)  | 38 (82.6%) | 95 (65.5%)  | 218 (90.1%) |
|                            | CG | 9 (11.3%)  | 15 (22.1%) | 9 (21.4%)   | 7 (15.2%)  | 43 (30.0%)  | 20 (8.3%)   |
|                            | GG | 1 (1.3%)   | 1 (1.5%)   | 2 (4.8%)    | 1 (2.17%)  | 7 (4.8%)    | 4 (1.7%)    |
| <i>APOC3M</i><br>-482C>T   | CC | 47 (57.3%) | 33 (48.5%) | 21 (50%)    | 20 (41.7%) | 68 (46.6%)  | 115 (47.5%) |
|                            | CT | 32 (39.0%) | 31 (45.6%) | 13 (31.0%)  | 21 (43.8%) | 64 (43.8%)  | 115 (47.5%) |
|                            | TT | 3 (3.7%)   | 4 (5.9%)   | 8 (19.1%)   | 7 (14.6%)  | 14 (9.6%)   | 12 (5.0%)   |
| <i>TRIB1</i><br>rs17321515 | AA | 30 (36.6%) | 28 (41.2%) | 15 (35.7%)  | 15 (31.3%) | 61 (41.8%)  | 66 (27.3%)  |
|                            | AG | 39 (47.6%) | 36 (52.9%) | 25 (59.5%)  | 29 (60.4%) | 69 (47.3%)  | 114 (47.1%) |
|                            | GG | 13 (15.9%) | 4 (5.9%)   | 2 (4.8%)    | 4 (8.3%)   | 16 (11.0%)  | 62 (25.6%)  |
| <i>TRIB1</i><br>rs2954029  | AA | 30 (39.5%) | 28 (41.2%) | 16 (40.0%)  | 15 (32.6%) | 64 (44.8%)  | 68 (28.3%)  |
|                            | AT | 34 (44.7%) | 36 (52.9%) | 22 (55.0%)  | 28 (60.9%) | 66 (46.2%)  | 114 (47.5%) |
|                            | TT | 12 (15.8%) | 4 (5.9%)   | 2 (5.0%)    | 3 (6.5%)   | 13 (9.1%)   | 58 (24.2%)  |
| <i>TBL2</i><br>rs17145738  | CC | 65 (79.3%) | 61 (89.7%) | 36 (85.7%)  | 43 (89.6%) | 126 (86.3%) | 175 (72.3%) |
|                            | CT | 16 (19.5%) | 7 (10.3%)  | 5 (11.9%)   | 5 (10.4%)  | 18 (12.3%)  | 62 (25.6%)  |
|                            | TT | 1 (1.2%)   | 0          | 1 (2.4%)    | 0          | 2 (1.4%)    | 5 (2.1%)    |
| <i>BAZ1B</i><br>rs2074755  | CC | 0          | 0          | 0           | 0          | 2 (1.4%)    | 5 (2.1%)    |
|                            | CT | 17 (20.7%) | 10 (14.7%) | 6 (14.3%)   | 5 (10.4%)  | 17 (11.7%)  | 63 (26.3%)  |

|                           |     |             |            |            |             |             |             |
|---------------------------|-----|-------------|------------|------------|-------------|-------------|-------------|
|                           | TT  | 65 (79.3%)  | 58 (85.3%) | 36 (85.7%) | 43 (89.6%)  | 126 (86.9%) | 172 (71.7%) |
| <i>GCKR</i> rs780094      | AA  | 12 (14.8%)  | 21 (30.9%) | 6 (14.3%)  | 8 (16.7%)   | 43 (29.5%)  | 35 (14.5%)  |
|                           | GA  | 39 (48.2%)  | 30 (44.1%) | 23 (54.8%) | 21 (43.8%)  | 69 (47.3%)  | 120 (49.6%) |
|                           | GG  | 30 (37.0%)  | 17 (25.0%) | 13 (31.0%) | 19 (39.6%)  | 34 (23.3%)  | 87 (36.0%)  |
| <i>GCKR</i> rs1260326     | CC  | 29 (35.4%)  | 15 (22.1%) | 11 (26.2%) | 19 (39.6%)  | 32 (21.9%)  | 84 (34.7%)  |
|                           | CT  | 39 (47.6%)  | 31 (45.6%) | 24 (57.1%) | 20 (41.7%)  | 67 (45.9%)  | 123 (50.8%) |
|                           | TT  | 14 (17.1%)  | 22 (32.4%) | 7 (16.6%)  | 9 (18.8%)   | 47 (32.2%)  | 35 (14.5%)  |
| <i>CILP2</i> rs16996148   | GG  | 71 (86.59%) | 59 (86.8%) | 38 (90.5%) | 40 (83.3%)  | 130 (89.0%) | 196 (81.0%) |
|                           | GT  | 11 (13.4%)  | 9 (13.2%)  | 4 (9.5%)   | 8 (16.7%)   | 16 (11.0%)  | 46 (19.0%)  |
| <i>SF4</i> rs10401969     | CC  | 1 (1.2%)    | 0          | 0          | 0           | 0           | 2 (0.8%)    |
|                           | CT  | 11 (13.4%)  | 9 (13.2%)  | 2 (4.8%)   | 7 (14.6%)   | 13 (8.9%)   | 38 (15.8%)  |
|                           | TT  | 70 (85.4%)  | 59 (86.8%) | 40 (95.2%) | 41 (85.4%)  | 133 (91.1%) | 200 (83.3%) |
| <i>APOE</i> isotype       | 2/2 | 0           | 3 (4.4%)   | 42 (100%)  | 0           | 1 (0.68%)   | 0           |
|                           | 3/2 | 6 (7.3%)    | 6 (8.8%)   | 0          | 6 (12.5%)   | 28 (19.2%)  | 31 (12.8%)  |
|                           | 3/3 | 59 (72.0%)  | 37 (54.4%) | 0          | 24 (50%)    | 76 (52.1%)  | 151 (62.4%) |
|                           | 4/2 | 0           | 1 (1.5%)   | 0          | 2 (4.2%)    | 6 (4.1%)    | 3 (1.2%)    |
|                           | 4/3 | 14 (17.1%)  | 19 (27.9%) | 0          | 15 (31.3%)  | 30 (20.6%)  | 51 (21.1%)  |
|                           | 4/4 | 3 (3.7%)    | 2 (2.9%)   | 0          | 1 (2.1%)    | 5 (3.4%)    | 6 (2.5%)    |
| <i>LPL</i> S447X          | SS  | 67 (81.7%)  | 55 (80.9%) | 36 (85.7%) | 46 (95.8%)  | 134 (91.8%) | 203 (83.9%) |
|                           | SX  | 15 (18.3%)  | 13 (19.1%) | 6 (14.3%)  | 1 (2.1%)    | 12 (8.2%)   | 39 (16.1%)  |
|                           | XX  | 0           | 0          | 0          | 1 (2.1%)    | 0           | 0           |
| <i>LPL</i> rs10503669     | AC  | 13 (15.9%)  | 12 (17.7%) | 5 (11.9%)  | 2 (4.2%)    | 11 (7.6%)   | 39 (16.2%)  |
|                           | CC  | 69 (84.2%)  | 56 (82.4%) | 37 (88.1%) | 46 (95.8%)  | 134 (92.4%) | 202 (83.8%) |
|                           |     | 0           | 0          | 0          | 0           | 0           | 0           |
| <i>LPL</i> rs17482753     | GG  | 66 (81.5%)  | 56 (82.4%) | 36 (85.7%) | 45 (95.7%)  | 135 (92.5%) | 198 (82.5%) |
|                           | GT  | 15 (18.5%)  | 12 (17.7%) | 6 (14.3%)  | 1 (2.1%)    | 11 (7.5%)   | 42 (17.5%)  |
|                           | TT  | 0           | 0          | 0          | 1 (2.1%)    | 0           | 0           |
| <i>LPL</i> rs6993414      | AA  | 67 (81.7%)  | 56 (82.4%) | 37 (88.1%) | 45 (93.8%)  | 132 (91.0%) | 199 (82.9%) |
|                           | AG  | 14 (17.1%)  | 12 (17.7%) | 4 (9.5%)   | 3 (6.3%)    | 13 (9.0%)   | 40 (16.7%)  |
|                           | GG  | 1 (1.2%)    | 0          | 1 (2.4%)   | 0           | 0           | 1 (0.42%)   |
| <i>ANGPTL3</i> rs12130333 | CC  | 54 (65.9%)  | 49 (72.1%) | 31 (75.6%) | 32 (66.67%) | 103 (70.6%) | 140 (57.9%) |
|                           | CT  | 25 (30.5%)  | 18 (26.5%) | 10 (24.4%) | 12 (25.0%)  | 41 (28.1%)  | 90 (37.2%)  |
|                           | TT  | 3 (3.7%)    | 1 (1.5%)   | 0          | 4 (8.3%)    | 2 (1.4%)    | 12 (5.0%)   |
| <i>ANGPTL3</i> rs1748195  | CC  | 36 (43.9%)  | 38 (55.9%) | 24 (57.1%) | 20 (41.7%)  | 89 (61.0%)  | 106 (43.8%) |

|                            |    |            |            |            |            |             |             |
|----------------------------|----|------------|------------|------------|------------|-------------|-------------|
|                            | CG | 39 (47.6%) | 26 (38.2%) | 18 (42.9%) | 21 (43.8%) | 52 (35.6%)  | 110 (45.5%) |
|                            | GG | 7 (8.5%)   | 4 (5.9%)   | 0          | 7 (14.6%)  | 5 (3.4%)    | 26 (10.7%)  |
| <i>GALNT2</i><br>rs4846914 | AA | 30 (36.6%) | 21 (30.9%) | 16 (38.1%) | 11 (22.9%) | 40 (27.4%)  | 84 (34.7%)  |
|                            | AG | 41 (50.0%) | 38 (55.9%) | 18 (42.9%) | 25 (52.1%) | 67 (45.9%)  | 135 (55.8%) |
|                            | GG | 11 (13.4%) | 9 (13.2%)  | 8 (19.1%)  | 12 (25.0%) | 39 (26.7%)  | 23 (9.5%)   |
| <i>PSRC1</i> rs599839      | AA | 59 (72.0%) | 49 (72.1%) | 26 (61.9%) | 30 (62.5%) | 84 (57.5%)  | 152 (62.8%) |
|                            | AG | 18 (22.0%) | 17 (25%)   | 14 (33.3%) | 16 (33.3%) | 56 (38.4%)  | 78 (32.2%)  |
|                            | GG | 5 (6.1%)   | 2 (2.9%)   | 2 (4.8%)   | 2 (4.2%)   | 6 (4.1%)    | 12 (5.0%)   |
| <i>LDLR</i> rs6511720      | GG | 63 (76.8%) | 55 (80.9%) | 33 (78.6%) | 39 (81.3%) | 117 (80.1%) | 185 (76.5%) |
|                            | GT | 19 (23.2%) | 13 (19.1%) | 8 (19.1%)  | 9 (18.8%)  | 25 (17.1%)  | 55 (22.7%)  |
|                            | TT | 0          | 0          | 1 (2.4%)   | 0          | 4 (2.7%)    | 2 (0.8%)    |
| <i>APOB</i> rs693          | CC | 22 (26.8%) | 16 (23.5%) | 11 (26.8%) | 16 (34.0%) | 39 (26.7%)  | 64 (26.5%)  |
|                            | CT | 38 (46.3%) | 30 (44.1%) | 20 (48.8%) | 25 (53.2%) | 68 (46.6%)  | 119 (49.2%) |
|                            | TT | 22 (26.8%) | 22 (32.4%) | 10 (24.4%) | 6 (12.8%)  | 39 (26.7%)  | 59 (24.4%)  |
| <i>SELP</i> rs3917820      | AG | 18 (22.2%) | 12 (17.7%) | 7 (17.5%)  | 11 (23.4%) | 40 (27.6%)  | 62 (25.8%)  |
|                            | GG | 63 (77.8%) | 56 (82.4%) | 33 (82.5%) | 36 (76.6%) | 105 (72.4%) | 178 (74.2%) |
| <i>LIPC</i> rs4775041      | CC | 9 (11.0%)  | 7 (10.3%)  | 5 (11.9%)  | 2 (4.2%)   | 20 (13.7%)  | 23 (9.5%)   |
|                            | CG | 35 (42.7%) | 32 (47.1%) | 16 (38.1%) | 12 (25.0%) | 57 (39.0%)  | 86 (35.5%)  |
|                            | GG | 38 (46.3%) | 29 (42.7%) | 21 (50%)   | 34 (70.8%) | 69 (47.3%)  | 133 (55.0%) |

Abbreviations: as in Table 2.

**Table S3. Univariate odds ratios (with 95% confidence intervals) for association of candidate genotypes with HLP types**

|                            |       | <b>Type 2A</b>            | <b>Type 2B</b>            | <b>Type 3</b>             | <b>Type 4</b>             | <b>Type 5</b>               |
|----------------------------|-------|---------------------------|---------------------------|---------------------------|---------------------------|-----------------------------|
| <i>APOA5</i><br>p.S19W     | W_DOM | 1.95 (0.99, 3.83) 0.0486  | 2.78 (1.50, 5.17) 0.0008  | 4.57 (2.31, 9.06) <0.0001 | 3.37 (1.83, 6.19) <0.0001 | 5.65 (3.47, 9.20) <0.0001   |
|                            | W_REC | 1.04 (0.12, 9.43) 0.9707  | 1.01 (0.11, 9.14) 0.9928  | 1.77 (0.19, 16.10) 0.6085 | 2.15 (0.39, 11.93) 0.3691 | 4.28 (1.24, 14.81) 0.0129   |
| <i>APOA5</i><br>-1131T>C   | C_DOM | 1.85 (0.97, 3.53) 0.0593  | 2.31 (1.26, 4.22) 0.0054  | 3.16 (1.55, 6.45) 0.001   | 4.22 (2.34, 7.66) <0.0001 | 4.59 (2.87, 7.34) <0.0001   |
|                            | C_REC | 4.47 (0.28, 72.18) 0.248  | 4.23 (0.26, 68.23) 0.2692 | 7.94 (0.49, 129.0) 0.0844 | 5.48 (0.34, 86.61) 0.1787 | 24.1 (3.03, 192) <0.0001    |
| <i>APOA5</i><br>rs6589566  | G_DOM | 1.29 (0.66, 2.56) 0.4566  | 2.18 (1.20, 3.94) 0.0091  | 2.94 (1.45, 5.96) 0.0019  | 3.71 (2.04, 6.73) <.0001  | 3.97 (2.46, 6.40) <.0001    |
|                            | G_REC | 3.53 (0.22, 57.99) 0.3359 | 3.40 (0.21, 54.85) 0.3598 | 6.45 (0.40, 104.8) 0.1327 | 4.39 (0.27, 71.00) 0.2555 | 21.94 (2.78, 173.05) <.0001 |
| <i>APOA5</i><br>rs12286037 | T_DOM | 1.59 (0.75, 3.36) 0.2226  | 2.82 (1.48, 5.36) 0.0011  | 4.76 (2.31, 9.84) <.0001  | 3.23 (1.63, 6.42) 0.0005  | 5.67 (3.36, 9.58) <.0001    |
|                            | T_REC | 0.89 (0.10, 8.10) 0.9203  | 0.84 (0.09, 7.57) 0.8733  | 1.59 (0.17, 14.49) 0.6799 | 2.25 (0.40, 12.55) 0.3411 | 3.22 (0.89, 11.58) 0.0594   |
| <i>BUD13</i><br>rs964184   | G_DOM | 1.56 (0.91, 2.08) 0.1011  | 2.73 (1.66, 4.50) <.0001  | 3.61 (1.89, 6.91) <.0001  | 4.02 (2.35, 6.87) <.0001  | 6.02 (3.93, 9.24) <.0001    |
|                            | G_REC | 2.39 (0.66, 8.66) 0.1718  | 2.95 (0.88, 9.91) 0.0666  | 9.58 (3.06, 29.99) <.0001 | 5.51 (1.80, 16.94) 0.0009 | 10.90 (4.38, 27.13) <.0001  |
| <i>BUD13</i><br>rs28927680 | G_DOM | 1.52 (0.74, 3.12) 0.2483  | 2.67 (1.43, 4.99) 0.0015  | 3.21 (1.51, 6.83) 0.0016  | 2.80 (1.41, 5.58) 0.0025  | 5.31 (3.19, 8.83) <.0001    |
|                            | G_REC | 0.88 (0.10, 7.94) 0.9065  | 1.70 (0.31, 9.41) 0.5413  | 3.32 (0.59, 18.63) 0.1492 | 2.36 (0.42, 13.17) 0.3122 | 3.85 (1.11, 13.35) 0.0231   |
| <i>APOC3M</i><br>-482C>T   | T_DOM | 0.68 (0.43, 1.00) 0.1165  | 0.88 (0.56, 1.38) 0.5831  | 0.79 (0.43, 1.46) 0.4486  | 1.23 (0.74, 2.05) 0.4246  | 1.00 (0.69, 1.45) 0.9978    |
|                            | T_REC | 0.52 (0.15, 1.80) 0.2951  | 1.42 (0.62, 3.25) 0.4100  | 3.25 (1.37, 7.72) 0.0050  | 1.91 (0.82, 4.42) 0.1253  | 1.53 (0.77, 3.02) 0.2223    |
| <i>TRIB1</i><br>rs17321515 | G_DOM | 0.66 (0.41, 1.07) 0.0895  | 0.56 (0.35, 0.90) 0.015   | 0.76 (0.41, 1.41) 0.377   | 0.90 (0.52, 1.55) 0.7112  | 0.53 (0.36, 0.78) 0.0012    |
|                            | G_REC | 0.59 (0.32, 1.08) 0.0851  | 0.19 (0.07, 0.47) <0.0001 | 0.28 (0.10, 0.81) 0.0125  | 0.35 (0.15, 0.78) 0.0078  | 0.39 (0.22, 0.68) 0.0007    |
| <i>TRIB1</i><br>rs2954029  | T_DOM | 0.61 (0.37, 0.99) 0.0469  | 0.57 (0.35, 0.93) 0.0229  | 0.69 (0.38, 1.35) 0.2797  | 0.79 (0.45, 1.38) 0.401   | 0.50 (0.33, 0.75) 0.0006    |
|                            | T_REC | 0.64 (0.33, 1.22) 0.1734  | 0.25 (0.10, 0.59) 0.0007  | 0.36 (0.12, 1.04) 0.0491  | 0.34 (0.14, 0.83) 0.0133  | 0.34 (0.18, 0.63) 0.0004    |
| <i>TBL2</i><br>rs17145738  | T_DOM | 0.91 (0.53, 1.57) 0.7304  | 0.38 (0.20, 0.78) 0.0061  | 0.53 (0.23, 1.22) 0.1316  | 0.29 (0.12, 0.69) 0.2929  | 0.52 (0.31, 0.87) 0.0128    |
|                            | T_REC | 1.12 (0.23, 5.35) 0.8901  | 0.54 (0.07, 4.37) 0.5579  | 1.03 (0.13, 8.37) 0.9812  | 0.32 (0.02, 5.57) 0.7512  | 0.67 (0.14, 3.19) 0.6128    |
| <i>BAZ1B</i><br>rs2074755  | C_DOM | 0.70 (0.40, 1.23) 0.2171  | 0.43 (0.23, 0.81) 0.0073  | 0.46 (0.20, 1.06) 0.0739  | 0.25 (0.10, 0.59) 0.0007  | 0.41 (0.24, 0.69) 0.0006    |
|                            | C_REC | 0.23 (0.01, 4.07)* 0.1563 | 0.22 (0.01, 3.94)* 0.1496 | 0.44 (0.02, 7.81)* 0.3052 | 0.29 (0.02, 5.22)* 0.2421 | 0.90 (0.23, 3.57) 0.8919    |

|                              |         |                            |                            |                             |                              |                            |
|------------------------------|---------|----------------------------|----------------------------|-----------------------------|------------------------------|----------------------------|
| <i>GCKR</i><br>rs780094      | A_DOM   | 0.90 (0.56, 1.45) 0.6747   | 1.32 (0.81, 2.16) 0.2694   | 1.26 (0.67, 2.38) 0.4793    | 0.97 (0.58, 1.64) 0.9238     | 1.82 (1.18, 2.79) 0.0058   |
|                              | A_REC   | 0.82 (0.42, 1.60) 0.5657   | 2.46 (1.47, 4.11) 0.0005   | 0.88 (0.38, 2.05) 0.7713    | 1.40 (0.75, 2.62) 0.2891     | 2.26 (1.46, 3.50) 0.0002   |
| <i>GCKR</i><br>rs1260326     | T_DOM   | 0.96 (0.58, 1.56) 0.8588   | 1.31 (0.79, 2.19) 0.2924   | 1.74 (0.85, 3.53) 0.1249    | 1.03 (0.60, 1.76) 0.9268     | 1.68 (1.08, 2.61) 0.0215   |
|                              | T_REC   | 1.02 (0.53, 1.95) 0.9502   | 2.60 (1.52, 4.42) 0.0003   | 1.25 (0.57, 2.73) 0.5814    | 1.43 (0.75, 2.73) 0.2727     | 2.64 (1.67, 4.17) <0.0001  |
| <i>CILP2</i><br>rs16996148   | T_DOM   | 0.61 (0.31, 1.18) 0.1385   | 0.64 (0.33, 1.22) 0.1754   | 0.34 (0.12, 1.00) 0.0406    | 0.83 (0.43, 1.60) 0.5772     | 0.48 (0.27, 0.86) 0.0115   |
|                              |         | no homozygous T            | no homozygous T            | no homozygous T             | no homozygous T              | no homozygous T            |
| <i>SF4</i><br>rs10401969     | C_DOM   | 0.83 (0.44, 1.57) 0.5682   | 0.73 (0.38, 1.41) 0.3488   | 0.19 (0.05, 0.81) 0.013     | 0.74 (0.36, 1.53) 0.4142     | 0.42 (0.22, 0.80) 0.007    |
|                              | C_REC   | 1.75 (0.16, 19.55) 0.6441  | 0.67 (0.03, 14.05)* 0.4404 | 1.26 (0.06, 26.69)* 0.5753  | 0.87 (0.04, 18.41)* 0.5002   | 0.41 (0.02, 8.65)* 0.3257  |
| <i>APOE</i> isotype          | NON-E3  | 0.85 (0.53, 1.36) 0.4916   | 1.52 (0.98, 2.33) 0.0586   | 180.4 (11.1, 2942)* <0.0001 | 1.14 (0.71, 1.81) 0.5919     | 2.04 (1.43, 2.89) <0.0001  |
| <i>LPL</i> p.S447X           | X447DOM | 1.39 (0.76, 2.56) 0.287    | 0.90 (0.48, 1.68) 0.7342   | 1.07 (0.46, 2.51) 0.8712    | 0.48 (0.20, 1.16) 0.097      | 0.49 (0.26, 0.94) 0.0302   |
|                              |         | no homozygous X            | no homozygous X            | no homozygous X             | no homozygous X              | no homozygous X            |
| <i>LPL</i><br>rs10503669     | A_DOM   | 0.84 (0.44, 1.60) 0.5979   | 0.83 (0.44, 1.57) 0.57     | 0.67 (0.27, 1.65) 0.3809    | 0.34 (0.13, 0.89)* 0.0213    | 0.36 (0.18, 0.71) 0.0024   |
|                              | A_REC   | no homozygous A            | no homozygous A            | no homozygous A             | 13.11 (0.53, 325.19)* 0.0371 | no homozygous A            |
| <i>LPL</i><br>rs17482753     | T_DOM   | 0.97 (0.53, 1.79) 0.9253   | 0.91 (0.49, 1.67) 0.7584   | 0.82 (0.37, 1.85) 0.6385    | 0.26 (0.09, 0.73) 0.0066     | 0.34 (0.17, 0.68) 0.0013   |
|                              | T_REC   | 1.17 (0.05, 29.00)* 0.5946 | 1.11 (0.04, 27.45)* 0.5844 | 2.03 (0.08, 50.65)* 0.687   | 4.36 (0.27, 70.55) 0.2579    | 0.68 (0.03, 16.86)* 0.4854 |
| <i>LPL</i> rs6993414         | G_DOM   | 0.95 (0.52, 1.75) 0.8765   | 0.80 (0.42, 1.51) 0.4938   | 0.77 (0.33, 1.81) 0.5488    | 0.38 (0.15, 0.99) 0.0408     | 0.47 (0.22, 0.78) 0.0055   |
|                              | G_REC   | 3.60 (0.50, 25.94) 0.1744  | 0.69 (0.03, 14.58)* 0.4489 | 3.45 (0.31, 38.76) 0.2867   | 0.86 (0.04, 18.01)* 0.4955   | 0.42 (0.02, 8.78)* 0.3295  |
| <i>ANGPTL3</i><br>rs12130333 | T_DOM   | 0.75 (0.46, 1.22) 0.2473   | 0.73 (0.45, 1.18) 0.1971   | 0.87 (0.47, 1.62) 0.6559    | 0.75 (0.44, 1.28) 0.2929     | 0.69 (0.46, 1.04) 0.0738   |
|                              | T_REC   | 0.70 (0.20, 2.40) 0.5637   | 0.92 (0.30, 2.76) 0.8775   | 0.88 (0.20, 3.89) 0.8638    | 1.20 (0.39, 3.62) 0.7512     | 0.28 (0.06, 1.20) 0.0676   |
| <i>ANGPTL3</i><br>rs1748195  | G_DOM   | 0.93 (0.58, 1.49) 0.7651   | 0.70 (0.44, 1.11) 0.1278   | 0.60 (0.32, 1.11) 0.1037    | 1.02 (0.60, 1.71) 0.9483     | 0.47 (0.32, 0.70) 0.0002   |
|                              | G_REC   | 0.63 (0.27, 1.47) 0.2822   | 1.00 (0.49, 2.06) 0.9907   | 0.33 (0.08, 1.43) 0.121     | 1.09, (0.50, 2.37) 0.8341    | 0.26 (0.10, 0.67) 0.003    |

|                            |       |                          |                           |                           |                            |                           |
|----------------------------|-------|--------------------------|---------------------------|---------------------------|----------------------------|---------------------------|
| <i>GALNT2</i><br>rs4846914 | G_DOM | 0.85 (0.53, 1.37) 0.5079 | 0.97 (0.60, 1.56) 0.8963  | 0.80 (0.44, 1.47) 0.4756  | 1.06 (0.62, 1.83) 0.829    | 1.24 (0.82, 1.88) 0.3019  |
|                            | G_REC | 0.80 (0.40, 1.58) 0.5158 | 1.03 (0.55, 1.93) 0.9348  | 1.81 (0.89, 3.64) 0.0956  | 1.57 (0.84, 2.96) 0.1584   | 2.17 (1.38, 3.42) 0.0007  |
| <i>PSRC1</i><br>rs599839   | G_DOM | 0.60 (0.36, 1.01) 0.0539 | 0.57 (0.34, 0.96) 0.0348  | 1.07 (0.57, 1.99) 0.8403  | 1.02 (0.60, 1.74) 0.9371   | 1.23 (0.83, 1.83) 0.2941  |
|                            | G_REC | 1.33 (0.47, 3.92) 0.5682 | 0.77 (0.21, 2.76) 0.6878  | 1.52 (0.42, 5.55) 0.5211  | 0.67 (0.15, 3.05) 0.604    | 1.10 (0.43, 2.80) 0.8493  |
| <i>LDLR</i><br>rs6511720   | T_DOM | 0.77 (0.44, 1.33) 0.3467 | 0.50 (0.27, 0.92) 0.0235  | 0.71 (0.34, 1.50) 0.3721  | 0.71 (0.38, 1.32) 0.2743   | 0.64 (0.40, 1.03) 0.0656  |
|                            | T_REC | 0.50 (0.03, 9.81)* 0.357 | 0.48 (0.02, 9.29)* 0.3438 | 2.28 (0.23, 22.34) 0.4685 | 1.50 (0.15, 14.59) 0.7275  | 2.81 (0.62, 12.71) 0.1618 |
| <i>APOB</i> rs693          | T_DOM | 0.87 (0.51, 1.46) 0.5888 | 1.49 (0.84, 2.63) 0.173   | 0.95 (0.48, 1.88) 0.8773  | 0.90 (0.50, 1.60) 0.7122   | 0.94 (0.61, 1.45) 0.7747  |
|                            | T_REC | 1.04 (0.61, 1.79) 0.878  | 1.22 (0.73, 2.05) 0.4403  | 1.01 (0.50, 2.04) 0.9716  | 0.75 (0.39, 1.41) 0.3676   | 1.10 (0.71, 1.71) 0.6635  |
| <i>SELP</i><br>rs3917820   | A_DOM | 0.91 (0.53, 1.58) 0.7405 | 0.68 (0.38, 1.21) 0.1902  | 0.56 (0.24, 1.30) 0.1719  | 0.91 (0.49, 1.68) 0.7578   | 1.08 (0.70, 1.68) 0.7239  |
|                            | A_REC | no homozygous A          | no homozygous A           | no homozygous A           | 14.2 (0.57, 354.0)* 0.0298 | no homozygous A           |
| <i>LIPC</i><br>rs4775041   | C_DOM | 1.15 (0.72, 1.85) 0.5413 | 1.42 (0.90, 2.28) 0.1331  | 0.90 (0.49, 1.64) 0.7213  | 0.50 (0.29, 0.86) 0.0108   | 1.14 (0.77, 1.68) 0.5054  |
|                            | C_REC | 1.05 (0.50, 2.24) 0.8851 | 0.79 (0.35, 1.77) 0.56    | 0.96 (0.36, 2.59) 0.937   | 0.79 (0.32, 1.97) 0.6165   | 1.29 (0.71, 2.33) 0.3979  |

---

Abbreviations: as in Table 2; DOM, dominant model evaluated for minor allele as indicated; REC, recessive model evaluated for minor allele as indicated; shown are odds ratios with 95% confidence intervals in parentheses followed by P-values.

---

**Table S4. Linkage disequilibrium correlation coefficients of SNP genotypes studied****Chromosome 11 apolipoprotein gene cluster**

|                         |                       |                         |                        |                       |                     |                      |
|-------------------------|-----------------------|-------------------------|------------------------|-----------------------|---------------------|----------------------|
|                         | <i>BUD13</i> rs964184 | <i>APOA5</i> rs12286037 | <i>APOA5</i> rs6589566 | <i>APOA5</i> -1131T>C | <i>APOA5</i> p.S19W | <i>APOC3</i> -482C>T |
| <i>BUD13</i> rs28927680 | 0.5319                | 0.9053*                 | 0.0689                 | 0.0320                | 0.9244*             | 0.0449               |
| <i>BUD13</i> rs964184   |                       | 0.6388*                 | 0.6880*                | 0.6192*               | 0.6089              | 0.1263               |
| <i>APOA5</i> rs12286037 |                       |                         | 0.0793                 | 0.0503                | 0.9529*             | 0.1247               |
| <i>APOA5</i> rs6589566  |                       |                         |                        | 0.8865*               | 0.0471              | 0.2859               |
| <i>APOA5</i> -1131T>C   |                       |                         |                        |                       | 0.0543              | 0.2514               |
| <i>APOA5</i> p.S19W     |                       |                         |                        |                       |                     | 0.0044               |

**Lipoprotein lipase gene locus**

|                       |                       |                       |                      |
|-----------------------|-----------------------|-----------------------|----------------------|
|                       | <i>LPL</i> rs17482753 | <i>LPL</i> rs10503669 | <i>LPL</i> rs6993414 |
| <i>LPL</i> p.S447X    | 0.7026*               | 0.5485*               | 0.6036*              |
| <i>LPL</i> rs17482753 |                       | 0.9577*               | 0.9086*              |
| <i>LPL</i> rs10503669 |                       |                       | 0.9449*              |

**Tribbles 1 gene locus**

|                         |                        |
|-------------------------|------------------------|
|                         | <i>TRIB1</i> rs2954029 |
| <i>TRIB1</i> rs17321515 | 0.9452*                |

**Glucokinase receptor gene locus**

|                      |                       |
|----------------------|-----------------------|
|                      | <i>GCKR</i> rs1260326 |
| <i>GCKR</i> rs780094 | 0.9456*               |

**Angiotensin like 3 gene locus**

|                           |                          |
|---------------------------|--------------------------|
|                           | <i>ANGPTL3</i> rs1748195 |
| <i>ANGPTL3</i> rs12130333 | 0.6858*                  |

**Chromosome 7 gene locus**

|                        |                        |
|------------------------|------------------------|
|                        | <i>BAZ1B</i> rs2074755 |
| <i>TBL2</i> rs17145738 | 0.9653*                |

Abbreviations: as in Table 2; \*P&lt;0.0001
